# Supplementary material for: Electrochemical Detection of Ultratrace Lead Ion through Attaching and Detaching DNA Aptamer from Electrochemically Reduced Graphene Oxide Electrode
Source: PubMed Central journal article supplement (PMC6630585; doi:10.3390/nano9060817), 2019-05-30
Supplement: nanomaterials-09-00817-s001.pdf [file nanomaterials-09-00817-s001.pdf]

# Electrochemical Detection of Ultratrace Lead Ion through Attaching and Detaching DNA Aptamer from Electrochemically Reduced Graphene Oxide Electrode

Su Hwan Yu<sup>†</sup>, Chang-Seuk Lee<sup>†</sup>, and Tae Hyun Kim<sup>\*</sup>

Department of Chemistry, Soonchunhyang University, Asan 31538, Korea; shsh422@naver.com (S.H.Y.) ; eriklee0329@sch.ac.kr (C.-S.L.)

\* Correspondence: thkim@sch.ac.kr; Tel.: +82-41-530-4722

† These authors contributed equally to this work.

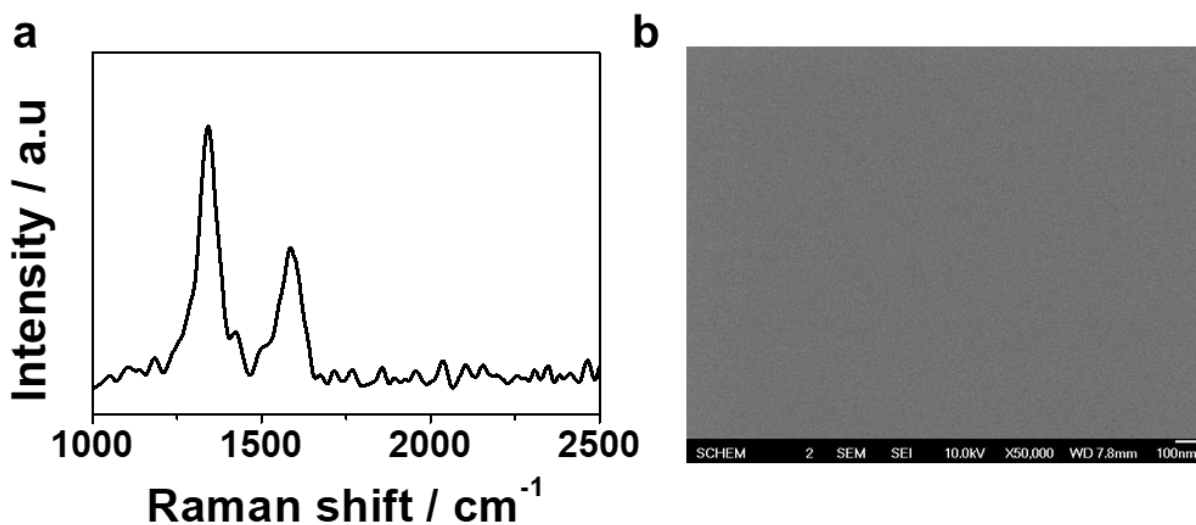

Figure S1. (a) Raman spectra of GCE; (c) SEM image of GCE.

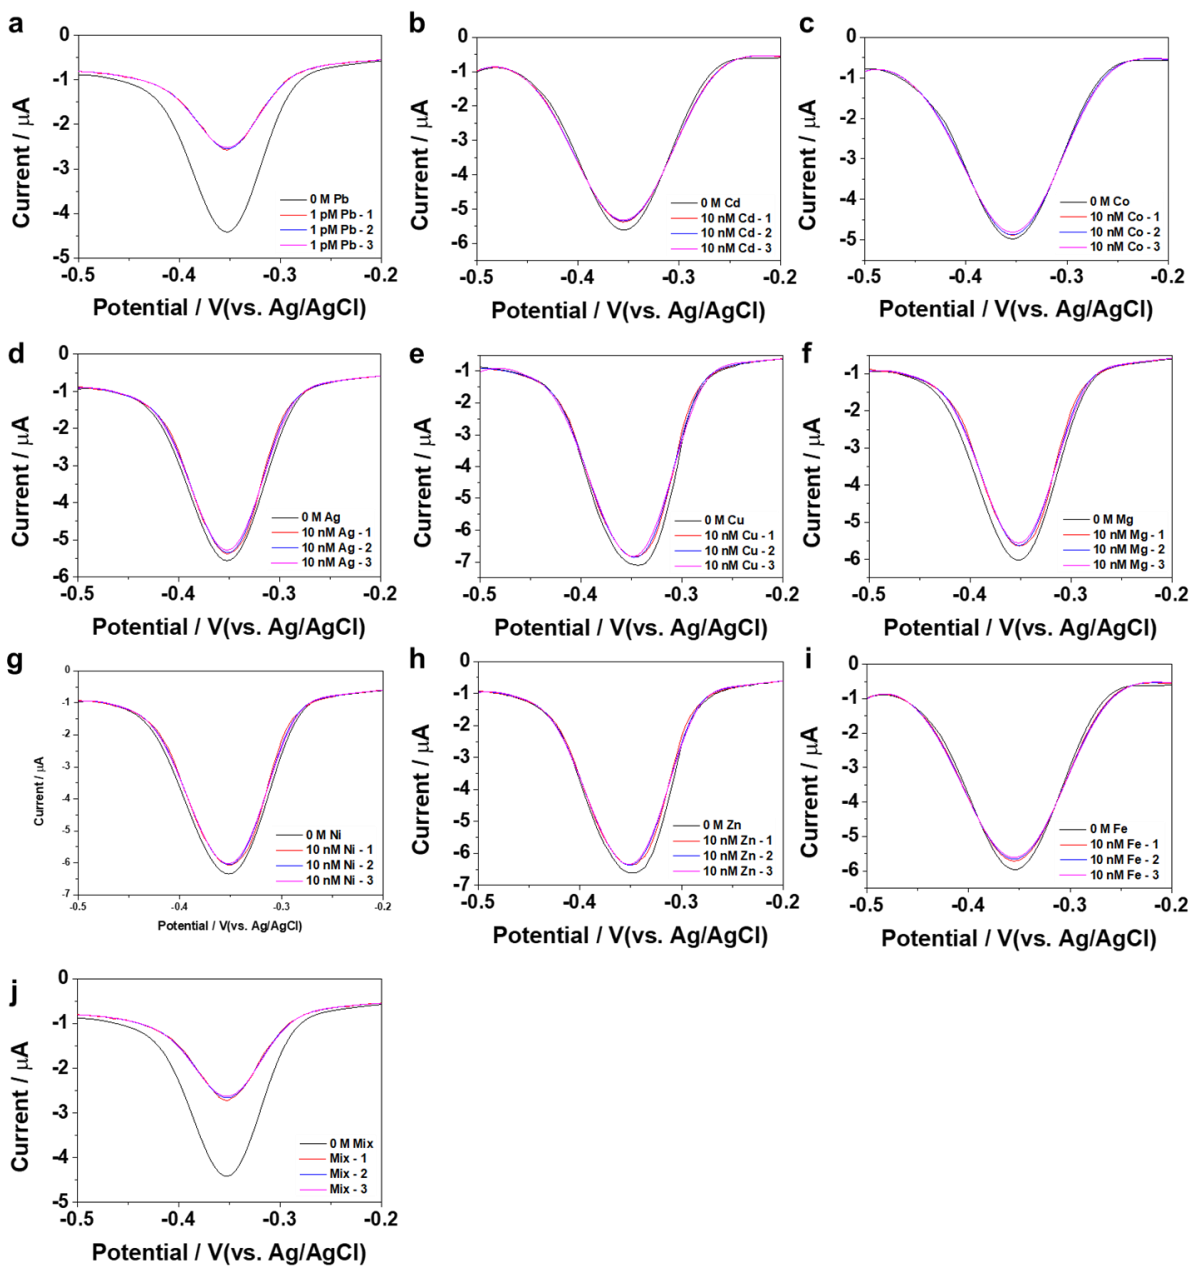

**Figure S2.** DPV curves of Apt/ERGO/GCE in the absence and presence of (a) 1 pM  $\text{Pb}^{2+}$ , (b) 10 nM  $\text{Cd}^{2+}$ , (c) 10 nM  $\text{Co}^{2+}$ , (d) 10 nM  $\text{Ag}^+$ , (e) 10 nM  $\text{Cu}^{2+}$ , (f) 10 nM  $\text{Mg}^{2+}$ , (g) 10 nM  $\text{Ni}^{2+}$ , (h) 10 nM  $\text{Zn}^{2+}$ , (i) 10 nM  $\text{Fe}^{2+}$ , and (j) mixed solution in 10 mM Tris buffer at pH 7.4. Mixed solution (Mix) contained 1 pM  $\text{Pb}^{2+}$  and various metal ions ( $\text{Cd}^{2+}$ ,  $\text{Co}^{2+}$ ,  $\text{Ag}^+$ ,  $\text{Cu}^{2+}$ ,  $\text{Mg}^{2+}$ ,  $\text{Ni}^{2+}$ ,

Zn<sup>2+</sup>, Fe<sup>2+</sup>) of 10 nM. Each measurement was performed three times. The accumulation time for Apt (1 μM) coating was 20 min and the incubation time for Pb<sup>2+</sup> detection was 20 min.

**Table S1.** Parameters values obtained from fittings of the impedance plots represented in Figure 2b.

| <b>EIS plot</b> | <b>R<sub>ct</sub>(Ω)</b> | <b>C(μF)</b> |
|-----------------|--------------------------|--------------|
| Bare GCE        | 467.28                   | 0.35         |
| ERGO/GCE        | 336.68                   | 0.24         |
| Apt/ERGO/GCE    | 2077.49                  | 1.74         |

**Table S2.** Parameters values obtained from fittings of the impedance plots represented in Figure 2c.

| <b>Concentration</b> | <b>R<sub>ct</sub>(Ω)</b> | <b>C(μF)</b> |
|----------------------|--------------------------|--------------|
| 0 M                  | 2077.49                  | 1.74         |
| 1 fM                 | 1737.12                  | 1.63         |
| 1 pM                 | 1530.82                  | 1.19         |
| 1 nM                 | 1392.62                  | 0.77         |
